# Supplementary material for: Altered TRPM7-Dependent Calcium Influx in Natural Killer Cells of Myalgic Encephalomyelitis/Chronic Fatigue Syndrome Patients
Source: MDPI journal article supplement (doi:10.3390/biom13071039), 2023-06-26
Supplement: s1 [file s1]

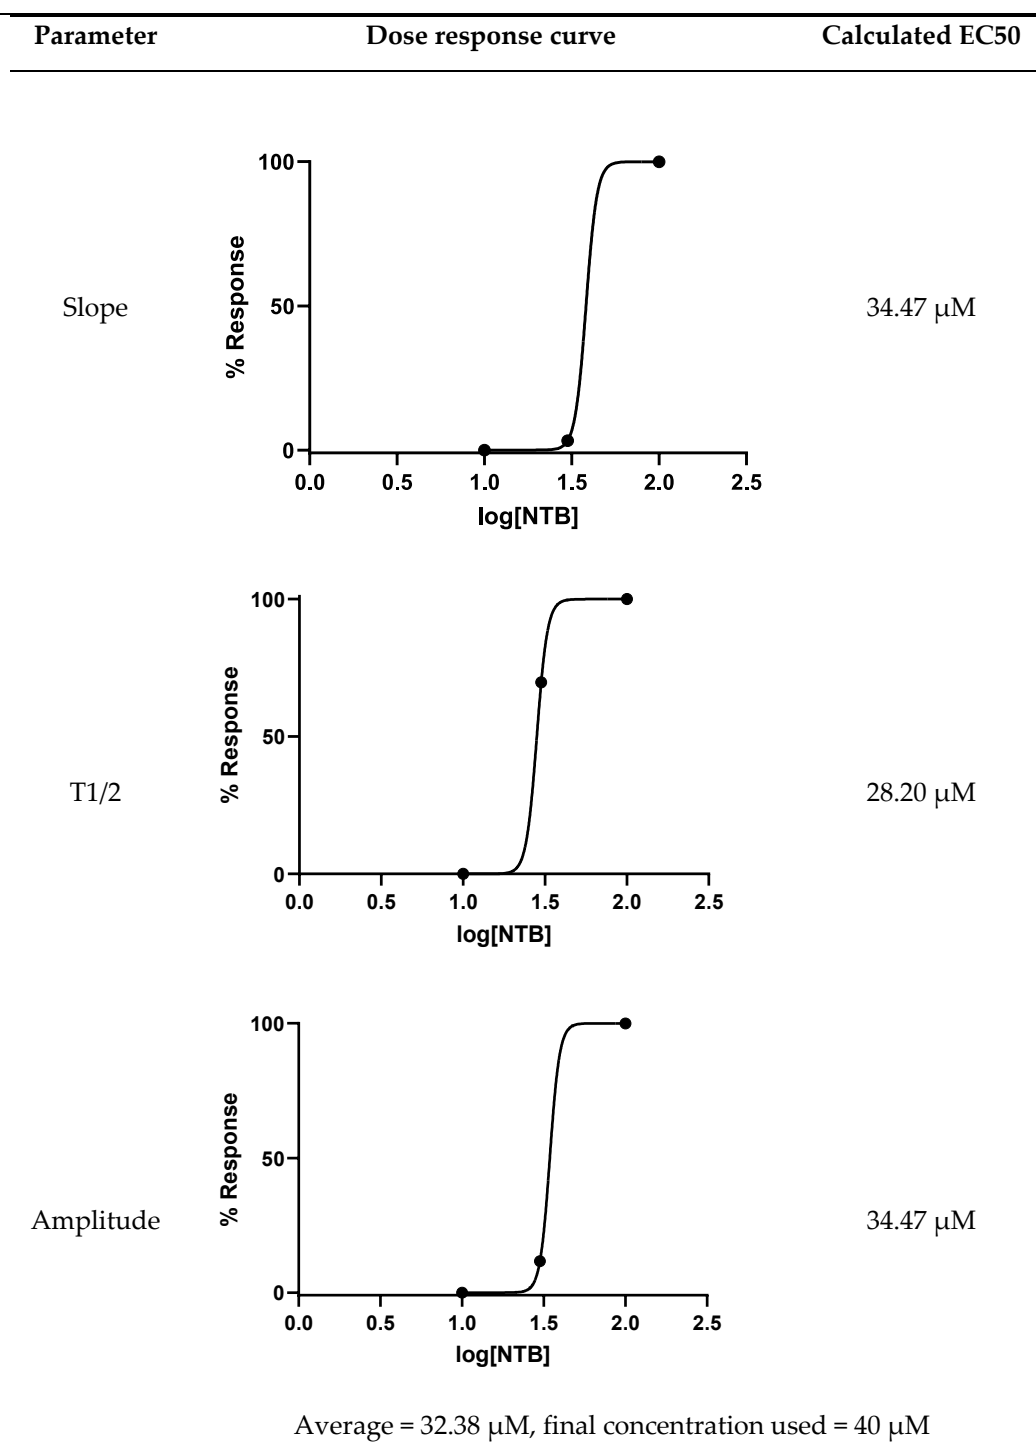

**Figure S1.** Naltriben dose responses and EC50 determination. Curves were produced using  $n = 4$  HC not included in the main study. Abbreviations: half maximal effective concentration (EC50), naltriben (NTB), half-time of maximal response (T1/2).

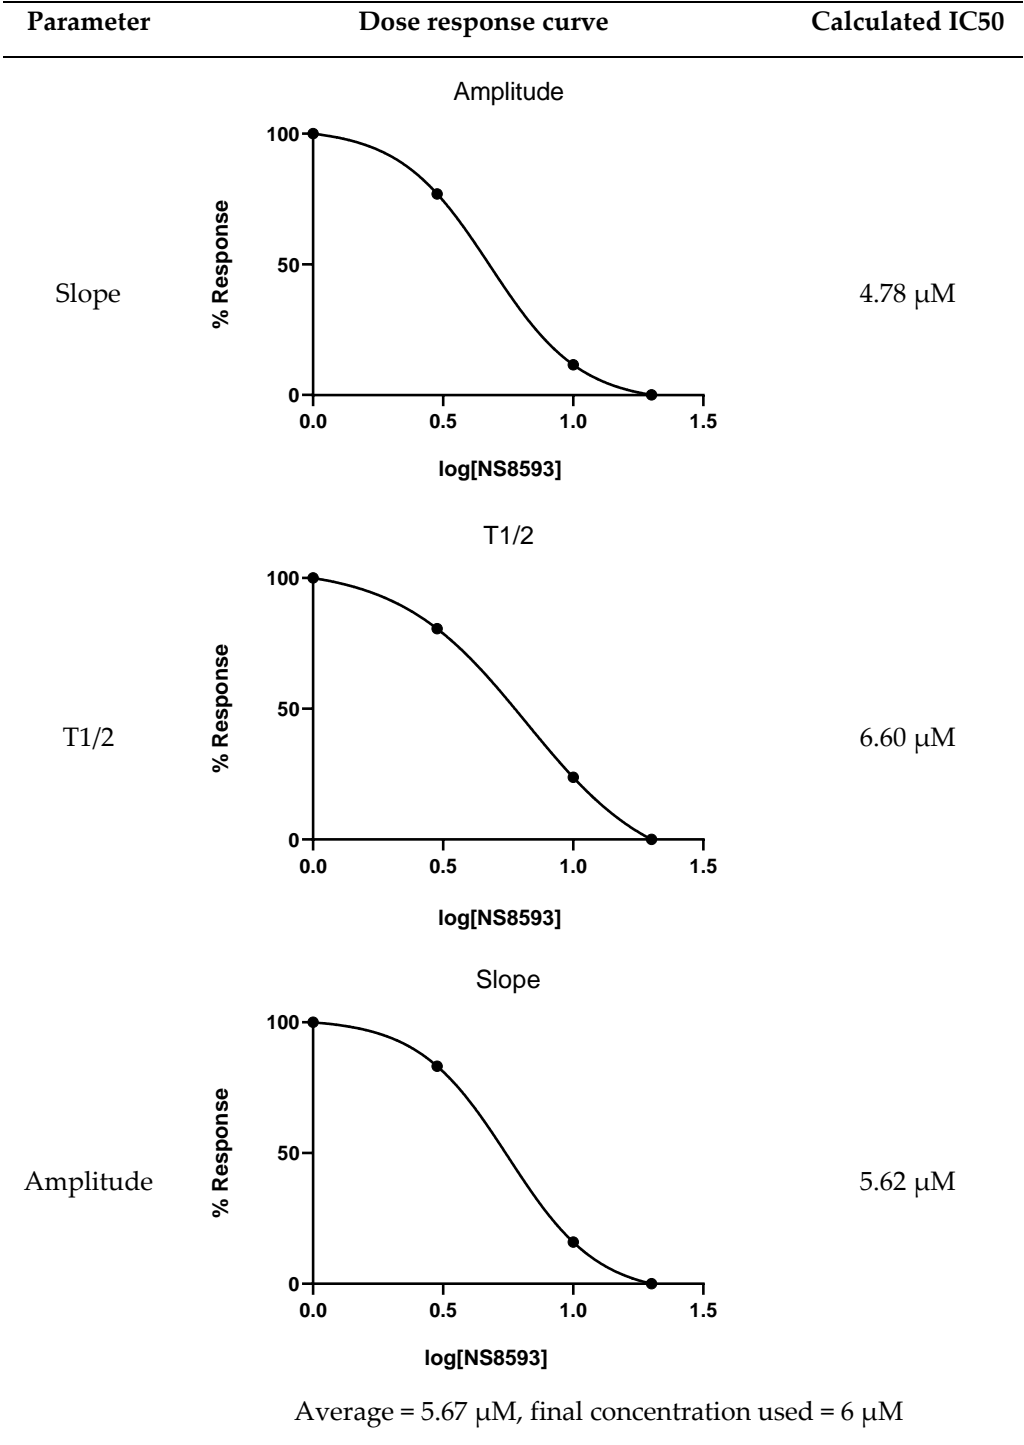

**Figure S2.** NS8593 dose responses and IC50 determination. Curves were produced using n = 4 HC not included in the main study. Abbreviations: half maximal inhibitory concentration (IC50), half-time of maximal response (T1/2).
